# Supplementary material for: Implementing a Standardized Care Pathway Integrating Oncology, Palliative Care and Community Care in a Rural Region of Mid-Norway
Source: Springer Nature journal article supplement (doi:10.1007/s40487-021-00176-y), 2021-11-03
Supplement: MOESM1 [file 24439040]

## **Implementing a standardized care pathway integrating oncology, palliative care and community care in a rural region of Mid-Norway**

Anne-Tove Brenne, MD, PhD\*<sup>1,2</sup>; Erik Torbjørn Løhre, MD, PhD\*<sup>1,2</sup>; Anne Kari Knudsen, MD, PhD<sup>3,4</sup>; Morten Thronæs, MD, PhD<sup>1,2</sup>; Jo-Åsmund Lund, MD, PhD<sup>1,5</sup>; Nina Kongshaug, MD<sup>1,2</sup>; Marte Nilssen Neverdal, MSc<sup>6</sup>; Kristina Rystad, MSc<sup>6</sup>; Marianne Haug Johansen, MSc<sup>2,7</sup>; Tone Inga Braseth, MSc<sup>2,7</sup> and Stein Kaasa, MD, PhD<sup>3,4,8</sup>

\* Contributed equally

Author affiliations:

<sup>1</sup>Department of Clinical and Molecular Medicine, Faculty of Medicine and Health Sciences, Norwegian University of Science and Technology, Trondheim, Norway

<sup>2</sup>Cancer Clinic, St. Olavs Hospital, Trondheim University Hospital, Trondheim, Norway

<sup>3</sup>European Palliative Care Research Centre (PRC), Department of Oncology, Oslo University Hospital, Oslo, Norway

<sup>4</sup>Section for Palliative Care, Department of Oncology, Oslo University Hospital, Oslo, Norway

<sup>5</sup>Department of Oncology, Ålesund Hospital, Møre og Romsdal Hospital Trust, Ålesund, Norway

<sup>6</sup>Department of Industrial Economics and Technology Management, Faculty of Economics and Management, Norwegian University of Science and Technology, Trondheim, Norway

<sup>7</sup>Department of Circulation and Medical Imaging, Faculty of Medicine and Health Sciences, Norwegian University of Science and Technology, Trondheim, Norway

<sup>8</sup>Institute of Clinical Medicine, Faculty of Medicine, University of Oslo, Oslo, Norway

Corresponding author: Anne-Tove Brenne. Address: Department of Clinical and Molecular Medicine, Faculty of Medicine and Health Sciences, NTNU - Norwegian University of Science and Technology, Postbox 8905, NO-7491 Trondheim, Norway.

Phone: +47 72825642

E-mail: [anne.tove.brenne@ntnu.no](mailto:anne.tove.brenne@ntnu.no)

## Supplementary Material

### Educational program for healthcare professionals

| When               | What                                                                    | Who                                                                                                                                       | N of participants    |
|--------------------|-------------------------------------------------------------------------|-------------------------------------------------------------------------------------------------------------------------------------------|----------------------|
| <b>Spring 2014</b> | Information meeting                                                     | Healthcare professionals from participating institutions                                                                                  | N.A. <sup>a</sup>    |
|                    | Information meeting                                                     | Health leaders of participating municipalities (home care and nursing homes)                                                              | N.A.                 |
|                    | Information meeting                                                     | Leaders of departments Orkdal hospital                                                                                                    | N.A.                 |
|                    | Cancer- and palliative care seminar 1 day (x 2)                         | Nurses hospital and primary care                                                                                                          | 52 + 23              |
|                    | Project group members visit the municipalities                          | Primary care physicians, primary care nurses and nurse assistants                                                                         | N.A.                 |
|                    | Internal medicine Orkdal hospital 45 min x 2                            | Physicians                                                                                                                                | N.A.                 |
| <b>Autumn 2014</b> | Basic palliative care course 5 x 3 h                                    | Primary care physicians and hospital physicians                                                                                           | 16                   |
|                    | Kick-off standardized care pathway, municipality and hospital 1 day     | Process facilitators<br>Study contacts<br>Cancer nurses from network                                                                      | 39                   |
|                    | Cancer- and palliative care seminar 1 day (x 2)                         | Nurses hospital and primary care                                                                                                          | 63 + 43              |
|                    | Information about the study and the standardized care pathway 2 h (x 5) | Health leaders<br>Process facilitators<br>Study contacts<br>Cancer nurses from network<br>Primary care physicians                         | 5 + 8 + 12 + 10 + 15 |
|                    | Internal medicine Orkdal hospital 45 min x 3                            | Physicians                                                                                                                                | N.A.                 |
| <b>Spring 2015</b> | Collaboration seminar 1 day                                             | Leaders<br>Process facilitators<br>Study contacts<br>Cancer nurses from network<br>Healthcare providers with interest in palliative care  | 50                   |
|                    | Internal medicine Orkdal hospital 45 min x 3                            | Physicians                                                                                                                                | N.A.                 |
| <b>Autumn 2015</b> | Basic palliative care course 5 x 3 h                                    | Primary care physicians and hospital physicians                                                                                           | 5                    |
|                    | "Meet the dying" 4 x 6 h                                                | Chaplains                                                                                                                                 | 27                   |
|                    | Cancer- and palliative care seminar 1 day (x 2)                         | Nurse assistants working in hospital and in primary care                                                                                  | 49 + 50              |
|                    | Internal medicine Orkdal hospital 45 min x 3                            | Physicians                                                                                                                                | N.A.                 |
| <b>Spring 2016</b> | Cancer- and palliative care seminar 1 day (x 2)                         | Nurses hospital and primary care                                                                                                          | 35 + 42              |
|                    | Collaboration seminar 1 day                                             | Leaders<br>Process facilitators<br>Study contacts<br>Cancer nurses from network<br>Health care providers with interest in palliative care | 43                   |
|                    | Cancer- and palliative care seminar 1 day                               | Nurses hospital and primary care                                                                                                          | 43 + 50              |
|                    | Internal medicine Orkdal hospital 45 min x 2                            | Physicians                                                                                                                                | N.A.                 |
| <b>Autumn 2016</b> | Basic palliative care course 5 x 3 h                                    | Primary care physicians and hospital physicians                                                                                           | 1                    |
|                    | Internal medicine Orkdal hospital 45 min x 2                            | Physicians                                                                                                                                | N.A.                 |
| <b>Spring 2017</b> | Collaboration seminar 1 day                                             | Leaders<br>Process facilitators<br>Study contacts<br>Cancer nurses from network<br>Health care providers with interest in palliative care | 44                   |
|                    | Internal medicine Orkdal Hospital 45 min x 1                            | Physicians                                                                                                                                | N.A.                 |
|                    | Project group members visit the municipalities                          | Primary care physicians, primary care nurses and nurse assistants                                                                         | N.A.                 |
| <b>Spring 2018</b> | Collaboration seminar to close the project                              | Leaders<br>Process facilitators<br>Study contacts<br>Cancer nurses from network<br>Healthcare providers with interest in palliative care  | 53                   |

<sup>a</sup> N.A.: Not assessed

Summary of interview data from interview guide 2

| <b>Categorization of challenges into three main themes:</b> |
|-------------------------------------------------------------|
| 1. Organizational cultural differences                      |
| 2. Organizational factors that hamper standardization       |
| 3. Decentralized decision-making and different priorities   |

|                                                             | <b>Hospital care</b>                                                            | <b>Primary care</b>                                                                                         |
|-------------------------------------------------------------|---------------------------------------------------------------------------------|-------------------------------------------------------------------------------------------------------------|
| <b>Perception of the SCP</b>                                | Superior, strategic vision of the SCP                                           | Few signs of anchorage of the SCP in the organizations                                                      |
|                                                             | SCP should contribute to increased competence about special patient groups      | The SCP must be based on patients' functional status                                                        |
|                                                             | The project and the SCP is a gift to primary care, has great transfer value     | Too much focus on cancer- the municipalities may have a need for giving priority to other health fields     |
|                                                             | "Cancer" not a diagnosis, the SCP is not diagnosis-based                        | "Cancer" is a diagnosis, the SCP is diagnosis-based                                                         |
|                                                             | The SCP may be narrow, but should be generalized to include all cancer patients | The SCP should be made general beyond cancer patients after project end                                     |
|                                                             | A living document- the SCP must be electronic and web-based                     | The SCP must be adapted to a working day in the "field", must be printed or adapted to the local ICT system |
| <b>Challenges in implementing an SCP across care levels</b> | HCPs consider the SCP as not being appropriate and user-friendly                | A too big and unrealistic project                                                                           |
|                                                             | A feeling that specialist care is "pulling the SCP down on" primary care        | Unrealistic resource claims form specialist care                                                            |
|                                                             | Too little involvement from primary care                                        | The municipalities must allocate resources to many activities and resources                                 |
|                                                             | Lack of priority from the municipalities                                        | Too little information and too little involvement from primary care                                         |
|                                                             | GPs reimbursement system                                                        | GPs organization, reimbursement system, and reluctance to check lists                                       |
|                                                             |                                                                                 | Few cancer patients in each municipality                                                                    |

SCP: standardized care pathway

GP: general practitioner

ICT: information and communications technology

Summary of interview data from interview guide 3

| <b>Three main categories were identified, subdivided into subgroups:</b>               |                                           |                                      |
|----------------------------------------------------------------------------------------|-------------------------------------------|--------------------------------------|
| <b>Competence</b>                                                                      | <b>Coordination</b>                       | <b>Patient/ carer</b>                |
| Project leader's role.<br>Seminars, meetings, the network of resource nurses' meetings | Routines at admittance and discharge      | Quality assurance of health care     |
| Process facilitator's role                                                             | Contact between hospital and municipality | User involvement                     |
| Education in use of SCP at the workplace                                               | Cancer nurse as coordinator               | Transferable to other patient groups |
| Staff and practical skills in palliative care                                          | Management anchoring                      |                                      |
| Evaluation and update of SCP                                                           | Nurse assistants' role in SCP             |                                      |

| <b>Barriers and success factors for use of standardized care pathway</b> |                                                                     |                                                              |                                                                                     |                                                                                    |
|--------------------------------------------------------------------------|---------------------------------------------------------------------|--------------------------------------------------------------|-------------------------------------------------------------------------------------|------------------------------------------------------------------------------------|
|                                                                          | <b>Competence</b>                                                   | <b>Coordination</b>                                          | <b>Patient/ carer</b>                                                               | <b>Practical factors</b>                                                           |
| <b>Success factors</b>                                                   | Ownership to SCP                                                    | Seminars, meetings, the network of resource nurses' meetings | Increased use of assessment tools gives better symptom control                      | Reminder of actual patients via electronic communication, visit notes or telephone |
|                                                                          | Process facilitators                                                | Low threshold for contact between hospital and primary care  | Flexibility between home and nursing home make the patient stay in the municipality | Evaluation and update of SCP                                                       |
|                                                                          | Practical education in use of SCP                                   | Home visits from hospital's palliative team                  | Transferable to other patient groups                                                | SCP adapted to local ICT-systems                                                   |
|                                                                          | Transfer of knowledge in palliative care from hospital to community | Electronic exchange of information                           |                                                                                     |                                                                                    |
|                                                                          | Job training                                                        | Management anchoring                                         |                                                                                     |                                                                                    |
|                                                                          | Management anchoring                                                |                                                              |                                                                                     |                                                                                    |
| <b>Barriers</b>                                                          | Lack of time to education and to put SCP into system                | Not well-defined claims from hospital to GPs                 | Few patients actual for the SCP in each municipality                                | ICT-issues                                                                         |
|                                                                          | Lack of resources and competence                                    | GPs not enough involved                                      | Difficult to identify the patients                                                  | The system not user-friendly                                                       |
|                                                                          | Lack of management anchorage                                        | Lack of management anchorage                                 |                                                                                     | Fire wall between hospital and GPs. In and out of ICT systems                      |
|                                                                          | Nurse assistants lack knowledge of SCP                              | A big responsibility for a few persons                       |                                                                                     |                                                                                    |

SCP: standardized care pathway

GP: general practitioner

ICT: information and communications technology
